# Supplementary material
Source: PubMed Central journal article supplement (PMC3224818)

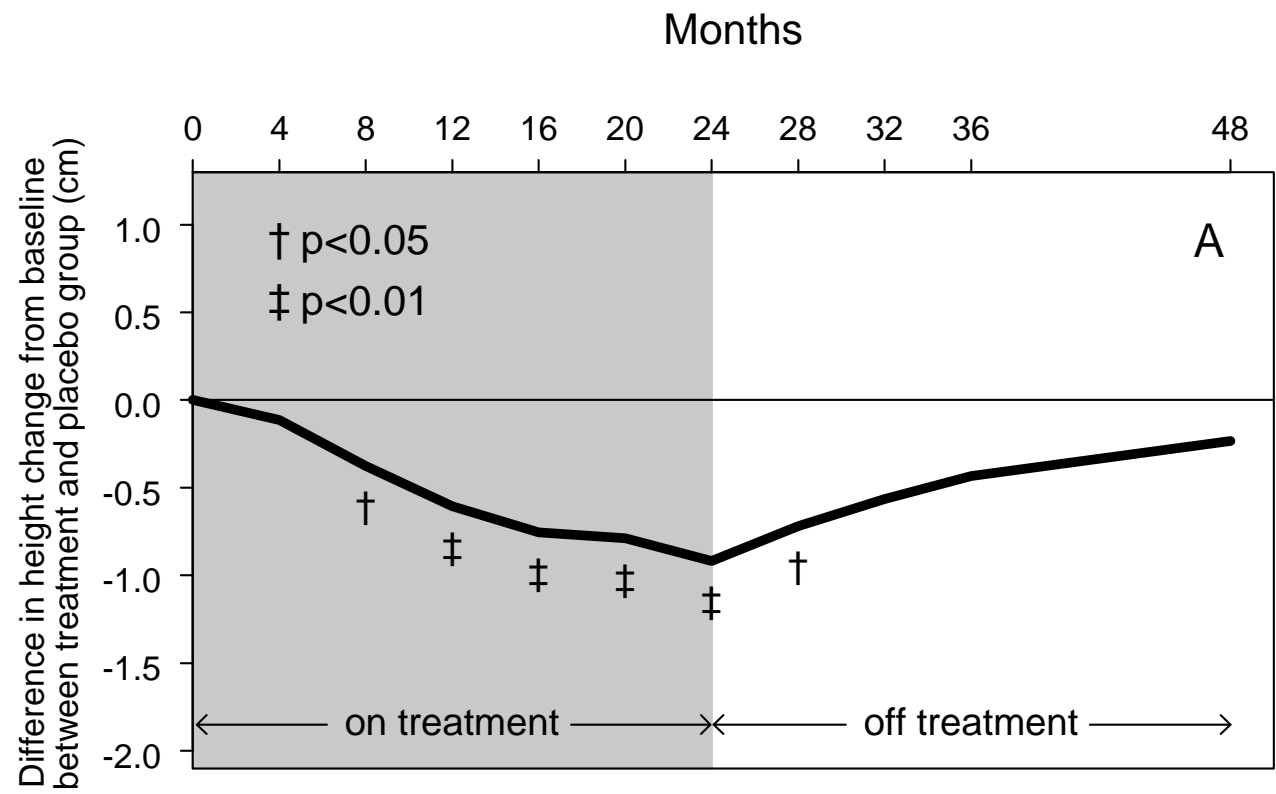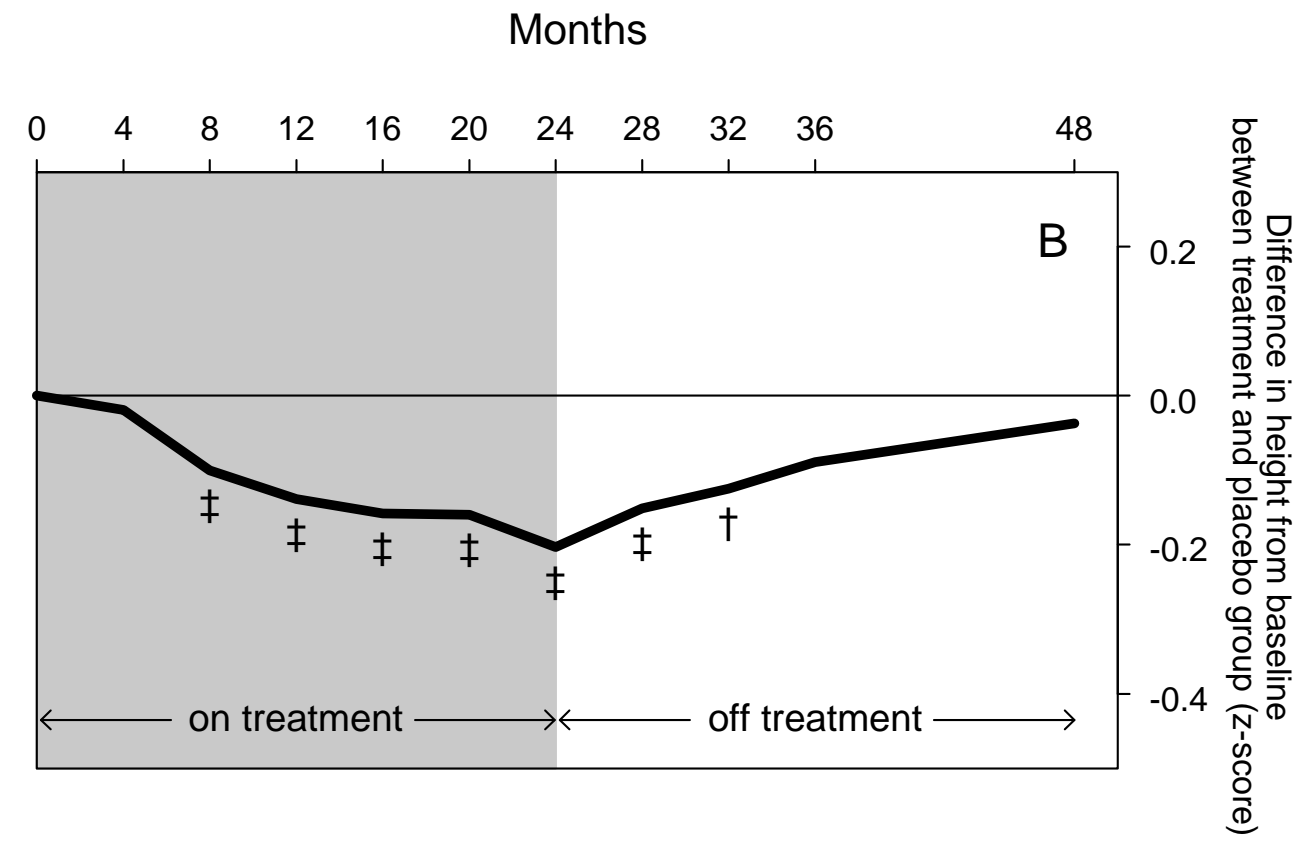

Supplement: NIHMS316711-supplement-3.pdf [file NIHMS316711-supplement-3.pdf]
